# Supplementary material
Source: PubMed Central journal article supplement (PMC3873491)

**A**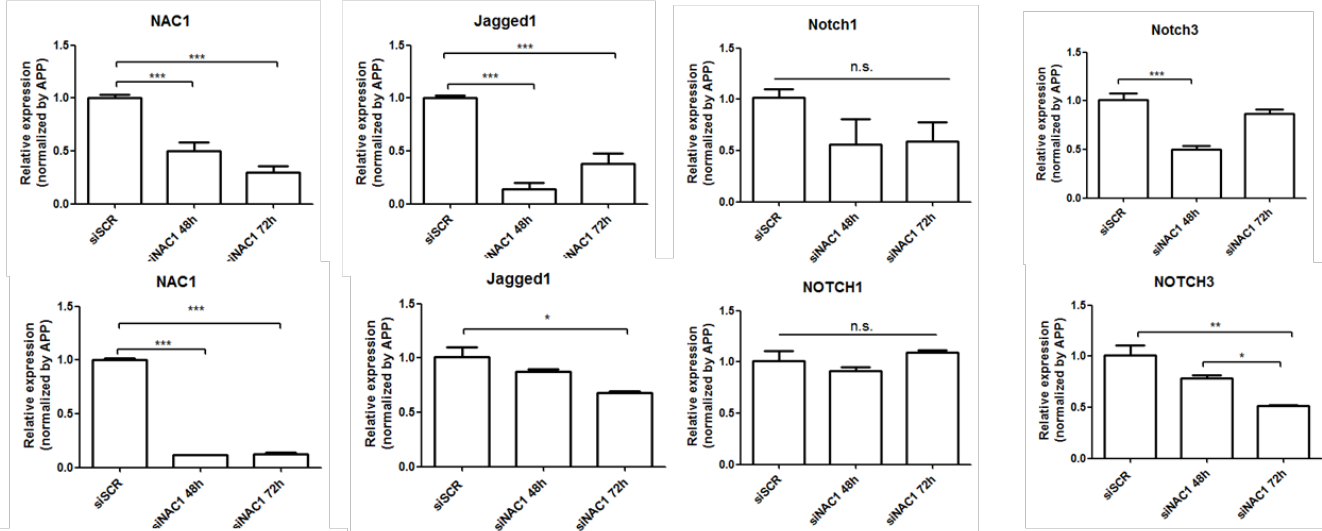**B**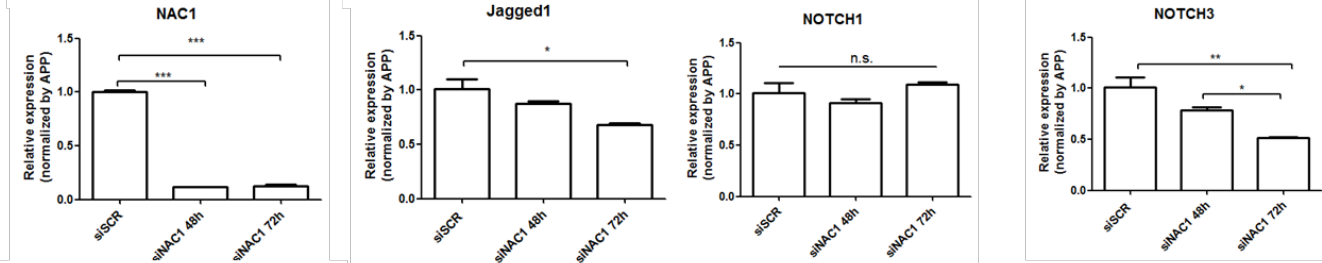**C**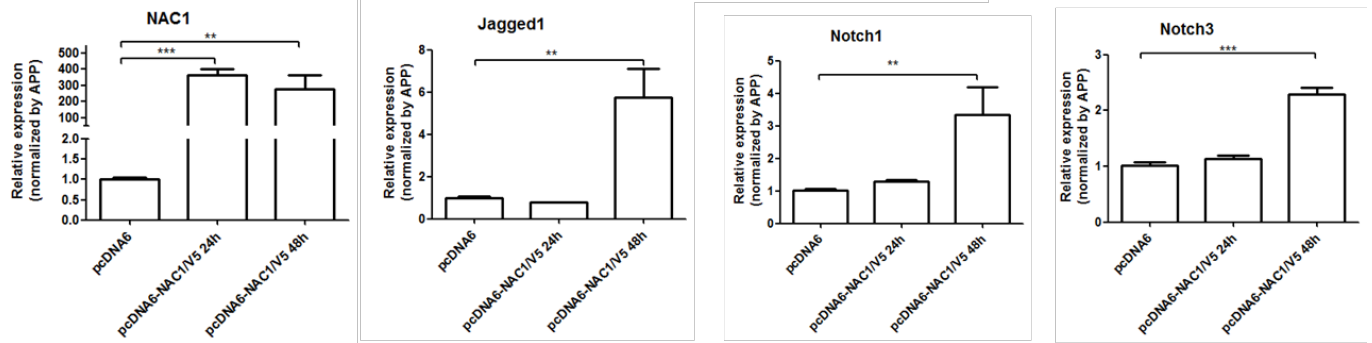

Supplemental Figure 1

Supplement: mmc1.pdf [file mmc1.pdf]
